# Supplementary material
Source: publisher site journal article supplement (https://www.dovepress.com/article/370006)
Supplement: Supplementary file 1 [file get_supplementary_file.php]

**Table S1. Distribution of molecular characterization of 20 *Klebsiella pneumoniae***

|                      | Strains number              | 1   | 2  | 3  | 4   | 5   | 6     | 7   | 8   | 9   | 10 | 11    | 12 | 13 | 14  | 15 | 16  | 17  | 18  | 19  | 20  |
|----------------------|-----------------------------|-----|----|----|-----|-----|-------|-----|-----|-----|----|-------|----|----|-----|----|-----|-----|-----|-----|-----|
| Virulence phenotypes | BF                          | +   | -  | +  | +   | +   | +     | +   | +   | +   | +  | +     | +  | +  | +   | -  | +   | +   | +   | +   | +   |
|                      | HMV                         | +   | -  | -  | -   | -   | +     | +   | -   | -   | -  | -     | +  | +  | -   | -  | -   | -   | -   | -   | -   |
| Virulence genes      | <i>wzi</i>                  | +   | +  | +  | +   | +   | +     | +   | +   | +   | +  | +     | +  | +  | +   | +  | +   | +   | +   | +   | +   |
|                      | <i>rmpA</i>                 | +   | -  | -  | -   | -   | +     | +   | -   | -   | -  | -     | +  | +  | -   | -  | -   | -   | -   | -   | -   |
|                      | <i>magA</i>                 | -   | -  | -  | -   | -   | -     | -   | -   | -   | -  | -     | +  | +  | -   | -  | -   | -   | -   | -   | -   |
|                      | <i>wabG</i>                 | +   | +  | +  | +   | +   | +     | +   | +   | +   | +  | +     | +  | +  | +   | +  | +   | +   | +   | +   | +   |
|                      | <i>fimH</i>                 | +   | +  | -  | +   | +   | +     | +   | +   | +   | +  | -     | +  | +  | +   | +  | +   | +   | +   | +   | +   |
|                      | <i>mrkD</i>                 | +   | +  | -  | +   | +   | +     | +   | +   | +   | +  | +     | +  | +  | +   | +  | -   | +   | +   | +   | +   |
|                      | <i>iucA</i>                 | -   | +  | -  | -   | -   | +     | +   | -   | -   | -  | -     | -  | +  | +   | -  | +   | +   | -   | -   | -   |
| <i>iutA</i>          | -                           | +   | -  | -  | -   | +   | +     | -   | -   | -   | -  | -     | +  | +  | -   | +  | -   | -   | -   | -   |     |
| Capsular serotypes   | <i>wzi</i> type             | 168 | 19 | 84 | 137 | 629 | 64    | 206 | 187 | 101 | 83 | 46    | 1  | 1  | 209 | 19 | 121 | 150 | 516 | 275 | 401 |
|                      | K type                      |     | 19 |    | 17  |     | 14/16 |     |     | 24  | 23 | 46/61 | 1  | 1  |     | 19 | 43  |     |     |     |     |
| ESBLs                | MDR                         | -   | +  | +  | +   | +   | -     | -   | +   | +   | +  | +     | -  | +  | +   | +  | +   | +   | -   | +   | -   |
|                      | phenotype                   | -   | +  | +  | -   | -   | -     | -   | +   | +   | +  | +     | -  | +  | +   | -  | +   | +   | -   | +   | -   |
|                      | <i>bla<sub>SHV</sub></i>    | -   | -  | -  | -   | +   | +     | +   | +   | +   | +  | +     | +  | +  | -   | +  | -   | +   | -   | +   | -   |
|                      | <i>bla<sub>CTX-M</sub></i>  | -   | +  | -  | -   | -   | -     | -   | -   | -   | -  | +     | +  | -  | +   | -  | -   | +   | +   | -   | +   |
| Carbapenems          | <i>bla<sub>TEM</sub></i>    | -   | +  | -  | -   | -   | -     | -   | +   | -   | +  | +     | -  | +  | -   | -  | +   | +   | -   | +   | -   |
|                      | phenotype                   | -   | +  | -  | +   | +   | -     | -   | -   | -   | -  | -     | -  | -  | -   | +  | -   | -   | -   | -   | -   |
|                      | <i>bla<sub>KPC</sub></i>    | -   | +  | -  | -   | +   | -     | -   | -   | -   | -  | -     | -  | -  | -   | +  | -   | -   | -   | -   | -   |
|                      | <i>bla<sub>NDM</sub></i>    | -   | -  | -  | -   | -   | -     | -   | -   | -   | -  | -     | -  | -  | -   | -  | -   | -   | -   | -   | -   |
|                      | <i>bla<sub>OXA-48</sub></i> | -   | -  | -  | -   | -   | -     | -   | -   | -   | -  | -     | -  | -  | -   | -  | -   | -   | -   | -   | -   |
| Quinolones           | <i>bla<sub>IMP</sub></i>    | -   | -  | -  | -   | -   | -     | -   | -   | -   | -  | -     | -  | -  | -   | -  | -   | -   | -   | -   | -   |
|                      | phenotype LVF               | -   | +  | +  | -   | +   | -     | -   | -   | +   | -  | +     | -  | +  | +   | +  | -   | +   | -   | -   | -   |
|                      | phenotype GAT               | -   | +  | +  | -   | +   | -     | -   | -   | +   | -  | +     | -  | +  | +   | +  | +   | +   | -   | -   | -   |
|                      | phenotype CIP               | -   | +  | +  | -   | +   | -     | -   | +   | +   | +  | +     | -  | +  | +   | +  | +   | +   | -   | +   | -   |
|                      | <i>qnrA</i>                 | -   | -  | -  | -   | -   | -     | -   | -   | -   | -  | -     | -  | -  | -   | -  | -   | -   | -   | -   | -   |
|                      | <i>qnrB</i>                 | -   | +  | -  | -   | -   | -     | -   | -   | +   | -  | +     | -  | -  | +   | -  | -   | +   | -   | -   | -   |
|                      | <i>oqxA</i>                 | +   | +  | +  | +   | +   | +     | +   | +   | +   | +  | +     | +  | +  | -   | +  | +   | +   | +   | +   | -   |
|                      | <i>oqxB</i>                 | +   | +  | +  | +   | +   | +     | +   | +   | +   | +  | +     | +  | +  | -   | +  | +   | +   | +   | +   | +   |
| <i>aac</i>           | -                           | +   | -  | -  | -   | -   | -     | -   | +   | +   | +  | +     | -  | +  | -   | -  | +   | +   | -   | -   |     |

Notes: +: Positive; -: Negative; MDR: Multi-drug resistant; BF: Biofilm; HMV: Hypermucoviscous phenotype

**Table S2. Distribution of resistance of 20 *Klebsiella pneumoniae* against 13 antibiotics**

| Strains number |         | aminoglycoside | quinolones |      |      | tetracyclines |      | carbapenem | cephalosporin |      |      | penicillins | ESBLs | Monocyclic lactam |
|----------------|---------|----------------|------------|------|------|---------------|------|------------|---------------|------|------|-------------|-------|-------------------|
|                |         | KAN            | GAT        | LVF  | CIP  | CHL           | DOX  | IPN        | CAZ           | CTX  | CFX  | PIP         | PIT   | AZT               |
|                | S:      | ≥18            | ≥18        | ≥17  | ≥21  | ≥18           | ≥14  | ≥23        | ≥21           | ≥26  | ≥18  | ≥21         | ≥21   | ≥21mm             |
|                | R:      | ≤13            | ≤14        | ≤13  | ≤20  | ≤12           | ≤10  | ≤19        | ≤17           | ≤22  | ≤14  | ≤17         | ≤17   | ≤17mm             |
| 1              |         | 28             | 28         | 32   | 40   | 25            | 18   | 26         | 26            | 29   | 25   | 22          | 25    | 31                |
|                |         | 27             | 29         | 31   | 36   | 25            | 20   | 27         | 29            | 30   | 27   | 22          | 25    | 34                |
|                |         | 27             | 28         | 30   | 37   | 24            | 20   | 25         | 27            | 30   | 25   | 20          | 24    | 32                |
|                | average | 27.3           | 28.3       | 31.0 | 37.7 | 24.7          | 19.3 | 26.0       | 27.3          | 29.7 | 25.7 | 21.3        | 24.7  | 32.3              |
| 2              |         | 6              | 15         | 12   | 6    | 27            | 16   | 14         | 8             | 6    | 6    | 6           | 7     | 6                 |
|                |         | 6              | 13         | 11   | 6    | 27            | 12   | 14         | 10            | 6    | 6    | 6           | 7     | 6                 |
|                |         | 7              | 13         | 11   | 5    | 25            | 13   | 15         | 10            | 6    | 5    | 7           | 8     | 5                 |
|                | average | 6.3            | 13.7       | 11.3 | 5.7  | 26.3          | 13.7 | 14.3       | 9.3           | 6.0  | 5.7  | 6.3         | 7.3   | 5.7               |
| 3              |         | 28             | 9          | 12   | 10   | 8             | 6    | 26         | 23            | 16   | 19   | 15          | 22    | 23                |
|                |         | 27             | 11         | 13   | 8    | 9             | 8    | 27         | 23            | 18   | 19   | 12          | 22    | 23                |
|                |         | 24             | 10         | 11   | 10   | 9             | 8    | 24         | 24            | 18   | 18   | 13          | 21    | 20                |
|                | average | 26.3           | 10.0       | 12.0 | 9.3  | 8.7           | 7.3  | 25.7       | 23.3          | 17.3 | 18.7 | 13.3        | 21.7  | 22.0              |
| 4              |         | 22             | 23         | 23   | 24   | 23            | 13   | 18         | 22            | 26   | 7    | 12          | 24    | 28                |
|                |         | 18             | 23         | 25   | 25   | 25            | 12   | 19         | 25            | 28   | 7    | 20          | 25    | 31                |
|                |         | 20             | 24         | 24   | 25   | 23            | 14   | 18         | 23            | 27   | 6    | 14          | 23    | 27                |
|                | average | 20.0           | 23.3       | 24.0 | 24.7 | 23.7          | 13.0 | 18.3       | 23.3          | 27.0 | 6.7  | 15.3        | 24.0  | 28.7              |
| 5              |         | 26             | 9          | 8    | 6    | 7             | 17   | 12         | 10            | 14   | 6    | 7           | 8     | 6                 |
|                |         | 28             | 12         | 8    | 6    | 7             | 18   | 11         | 11            | 12   | 6    | 8           | 9     | 6                 |
|                |         | 26             | 11         | 7    | 7    | 8             | 16   | 11         | 12            | 13   | 6    | 8           | 9     | 7                 |
|                | average | 26.7           | 10.7       | 7.7  | 6.3  | 7.3           | 17.0 | 11.3       | 11.0          | 13.0 | 6.0  | 7.7         | 8.7   | 6.3               |
| 6              |         | 22             | 30         | 26   | 35   | 22            | 20   | 26         | 25            | 29   | 27   | 22          | 22    | 30                |
|                |         | 22             | 26         | 26   | 34   | 25            | 19   | 26         | 25            | 28   | 24   | 23          | 21    | 30                |
|                |         | 21             | 26         | 27   | 30   | 25            | 20   | 24         | 24            | 26   | 25   | 22          | 20    | 28                |
|                | average | 21.7           | 27.3       | 26.3 | 33.0 | 24.0          | 19.7 | 25.3       | 24.7          | 27.7 | 25.3 | 22.3        | 21.0  | 29.3              |
| 7              |         | 22             | 25         | 32   | 42   | 24            | 17   | 24         | 25            | 28   | 24   | 20          | 24    | 29                |
|                |         | 20             | 28         | 28   | 40   | 25            | 19   | 25         | 25            | 29   | 25   | 21          | 25    | 29                |
|                |         | 20             | 26         | 28   | 39   | 24            | 18   | 24         | 23            | 26   | 24   | 20          | 23    | 27                |
|                | average | 20.7           | 26.3       | 29.3 | 40.3 | 24.3          | 18.0 | 24.3       | 24.3          | 27.7 | 24.3 | 20.3        | 24.0  | 28.3              |
| 8              |         | 8              | 18         | 18   | 13   | 11            | 8    | 24         | 22            | 16   | 24   | 9           | 23    | 25                |
|                |         | 9              | 18         | 18   | 13   | 9             | 7    | 24         | 22            | 16   | 25   | 10          | 22    | 26                |
|                |         | 8              | 17         | 20   | 15   | 10            | 8    | 22         | 23            | 14   | 22   | 10          | 21    | 24                |
|                | average | 8.3            | 17.7       | 18.7 | 13.7 | 10.0          | 7.7  | 23.3       | 22.3          | 15.3 | 23.7 | 9.7         | 22.0  | 25.0              |
| 9              |         | 20             | 10         | 12   | 8    | 6             | 6    | 22         | 10            | 15   | 18   | 7           | 19    | 19                |
|                |         | 19             | 9          | 12   | 10   | 6             | 6    | 23         | 14            | 14   | 19   | 8           | 19    | 16                |
|                |         | 19             | 10         | 13   | 10   | 6             | 7    | 20         | 13            | 13   | 18   | 8           | 20    | 17                |
|                | average | 19.3           | 9.7        | 12.3 | 9.3  | 6.0           | 6.3  | 21.7       | 12.3          | 14.0 | 18.3 | 7.7         | 19.3  | 17.3              |
| 10             |         | 16             | 16         | 14   | 7    | 24            | 10   | 24         | 16            | 10   | 22   | 7           | 20    | 16                |
|                |         | 16             | 17         | 17   | 7    | 24            | 10   | 25         | 16            | 10   | 21   | 7           | 21    | 16                |
|                |         | 16             | 16         | 15   | 7    | 22            | 9    | 24         | 17            | 11   | 21   | 7           | 20    | 15                |
|                | average | 16.0           | 16.3       | 15.3 | 7.0  | 23.3          | 9.7  | 24.3       | 16.3          | 10.3 | 21.3 | 7.0         | 20.3  | 15.7              |

|                                                                                                                                                                                                                                                                                    |         |       |       |       |       |       |       |       |       |       |       |       |       |      |
|------------------------------------------------------------------------------------------------------------------------------------------------------------------------------------------------------------------------------------------------------------------------------------|---------|-------|-------|-------|-------|-------|-------|-------|-------|-------|-------|-------|-------|------|
| 11                                                                                                                                                                                                                                                                                 |         | 7     | 6     | 6     | 7     | 6     | 6     | 27    | 10    | 8     | 17    | 7     | 19    | 8    |
|                                                                                                                                                                                                                                                                                    |         | 7     | 6     | 6     | 7     | 6     | 6     | 25    | 9     | 7     | 17    | 7     | 19    | 7    |
|                                                                                                                                                                                                                                                                                    |         | 9     | 7     | 7     | 9     | 6     | 7     | 24    | 10    | 6     | 19    | 8     | 20    | 7    |
|                                                                                                                                                                                                                                                                                    | average | 7.7   | 6.3   | 6.3   | 7.7   | 6.0   | 6.3   | 25.3  | 9.7   | 7.0   | 17.7  | 7.3   | 19.3  | 7.3  |
| 12                                                                                                                                                                                                                                                                                 |         | 22    | 28    | 30    | 32    | 25    | 18    | 28    | 22    | 25    | 24    | 19    | 24    | 24   |
|                                                                                                                                                                                                                                                                                    |         | 20    | 27    | 31    | 32    | 25    | 18    | 25    | 24    | 26    | 25    | 19    | 25    | 28   |
|                                                                                                                                                                                                                                                                                    |         | 20    | 26    | 30    | 30    | 24    | 16    | 24    | 24    | 25    | 23    | 18    | 24    | 26   |
|                                                                                                                                                                                                                                                                                    | average | 20.7  | 27.0  | 30.3  | 31.3  | 24.7  | 17.3  | 25.7  | 23.3  | 25.3  | 24.0  | 18.7  | 24.3  | 26.0 |
| 13                                                                                                                                                                                                                                                                                 |         | 7     | 10    | 13    | 10    | 6     | 9     | 25    | 7     | 6     | 18    | 7     | 17    | 6    |
|                                                                                                                                                                                                                                                                                    |         | 7     | 12    | 13    | 10    | 6     | 11    | 26    | 6     | 6     | 19    | 7     | 18    | 6    |
|                                                                                                                                                                                                                                                                                    |         | 7     | 12    | 12    | 9     | 7     | 10    | 24    | 6     | 8     | 17    | 8     | 19    | 7    |
|                                                                                                                                                                                                                                                                                    | average | 7.0   | 11.3  | 12.7  | 9.7   | 6.3   | 10.0  | 25.0  | 6.3   | 6.7   | 18.0  | 7.3   | 18.0  | 6.3  |
| 14                                                                                                                                                                                                                                                                                 |         | 22    | 6     | 7     | 7     | 6     | 14    | 26    | 6     | 13    | 12    | 8     | 18    | 6    |
|                                                                                                                                                                                                                                                                                    |         | 21    | 7     | 7     | 7     | 7     | 15    | 26    | 6     | 10    | 10    | 7     | 19    | 6    |
|                                                                                                                                                                                                                                                                                    |         | 21    | 7     | 7     | 8     | 6     | 13    | 24    | 7     | 11    | 10    | 8     | 16    | 7    |
|                                                                                                                                                                                                                                                                                    | average | 21.3  | 6.7   | 7.0   | 7.3   | 6.3   | 14.0  | 25.3  | 6.3   | 11.3  | 10.7  | 7.7   | 17.7  | 6.3  |
| 15                                                                                                                                                                                                                                                                                 |         | 7     | 12    | 10    | 9     | 25    | 20    | 13    | 13    | 12    | 6     | 7     | 9     | 8    |
|                                                                                                                                                                                                                                                                                    |         | 7     | 14    | 10    | 8     | 28    | 19    | 13    | 11    | 10    | 6     | 8     | 11    | 7    |
|                                                                                                                                                                                                                                                                                    |         | 9     | 11    | 9     | 8     | 26    | 18    | 14    | 11    | 11    | 7     | 9     | 11    | 8    |
|                                                                                                                                                                                                                                                                                    | average | 7.7   | 12.3  | 9.7   | 8.3   | 26.3  | 19.0  | 13.3  | 11.7  | 11.0  | 6.3   | 8.0   | 10.3  | 7.7  |
| 16                                                                                                                                                                                                                                                                                 |         | 7     | 11    | 18    | 9     | 6     | 7     | 25    | 17    | 9     | 20    | 7     | 22    | 15   |
|                                                                                                                                                                                                                                                                                    |         | 7     | 12    | 19    | 9     | 6     | 8     | 26    | 17    | 9     | 20    | 7     | 23    | 16   |
|                                                                                                                                                                                                                                                                                    |         | 8     | 11    | 17    | 10    | 7     | 7     | 25    | 17    | 10    | 18    | 7     | 22    | 15   |
|                                                                                                                                                                                                                                                                                    | average | 7.3   | 11.3  | 18.0  | 9.3   | 6.3   | 7.3   | 25.3  | 17.0  | 9.3   | 19.3  | 7.0   | 22.3  | 15.3 |
| 17                                                                                                                                                                                                                                                                                 |         | 7     | 11    | 11    | 11    | 6     | 12    | 24    | 21    | 12    | 22    | 7     | 23    | 18   |
|                                                                                                                                                                                                                                                                                    |         | 7     | 11    | 11    | 11    | 6     | 12    | 24    | 22    | 12    | 23    | 7     | 23    | 18   |
|                                                                                                                                                                                                                                                                                    |         | 10    | 12    | 11    | 13    | 8     | 10    | 22    | 21    | 12    | 20    | 7     | 25    | 20   |
|                                                                                                                                                                                                                                                                                    | average | 8.0   | 11.3  | 11.0  | 11.7  | 6.7   | 11.3  | 23.3  | 21.3  | 12.0  | 21.7  | 7.0   | 23.7  | 18.7 |
| 18                                                                                                                                                                                                                                                                                 |         | 26    | 26    | 27    | 29    | 26    | 21    | 25    | 23    | 25    | 27    | 11    | 23    | 27   |
|                                                                                                                                                                                                                                                                                    |         | 21    | 26    | 27    | 28    | 25    | 20    | 25    | 24    | 28    | 23    | 11    | 24    | 28   |
|                                                                                                                                                                                                                                                                                    |         | 21    | 24    | 24    | 27    | 25    | 20    | 23    | 24    | 26    | 24    | 12    | 20    | 26   |
|                                                                                                                                                                                                                                                                                    | average | 22.7  | 25.3  | 26.0  | 28.0  | 25.3  | 20.3  | 24.3  | 23.7  | 26.3  | 24.7  | 11.3  | 22.3  | 27.0 |
| 19                                                                                                                                                                                                                                                                                 |         | 7     | 18    | 24    | 18    | 18    | 8     | 25    | 14    | 9     | 19    | 6     | 21    | 10   |
|                                                                                                                                                                                                                                                                                    |         | 7     | 18    | 26    | 20    | 18    | 8     | 23    | 14    | 8     | 19    | 6     | 19    | 11   |
|                                                                                                                                                                                                                                                                                    |         | 9     | 16    | 24    | 19    | 18    | 10    | 23    | 12    | 8     | 20    | 7     | 19    | 10   |
|                                                                                                                                                                                                                                                                                    | average | 7.7   | 17.3  | 24.7  | 19.0  | 18.0  | 8.7   | 23.7  | 13.3  | 8.3   | 19.3  | 6.3   | 19.7  | 10.3 |
| 20                                                                                                                                                                                                                                                                                 |         | 20    | 29    | 26    | 29    | 26    | 20    | 23    | 22    | 25    | 23    | 17    | 23    | 26   |
|                                                                                                                                                                                                                                                                                    |         | 20    | 27    | 26    | 28    | 27    | 19    | 24    | 22    | 29    | 22    | 17    | 24    | 28   |
|                                                                                                                                                                                                                                                                                    |         | 18    | 25    | 26    | 26    | 25    | 19    | 23    | 21    | 24    | 22    | 15    | 23    | 27   |
|                                                                                                                                                                                                                                                                                    | average | 19.3  | 27.0  | 26.0  | 27.7  | 26.0  | 19.3  | 23.3  | 21.7  | 26.0  | 22.3  | 16.3  | 23.3  | 27.0 |
| Total of resistant strains                                                                                                                                                                                                                                                         | 8       | 10    | 9     | 13    | 9     | 8     | 4     | 10    | 13    | 5     | 16    | 3     | 9     |      |
| Rates of resistance                                                                                                                                                                                                                                                                | 40.0%   | 50.0% | 45.0% | 65.0% | 45.0% | 40.0% | 20.0% | 50.0% | 65.0% | 25.0% | 80.0% | 15.0% | 45.0% |      |
| S: susceptibility; R: resistance; CAZ:Ceftazidime, CTX:Cefotaxime, CFX: Cefoxitin, PIP: Piperacillin, AZT:Aztreonam, PIT: Piperacillin-tazobactam, CHL: Chloramphenicol, IPN: Imipenem, DOX: Doxycycline, KAN: Kanamycin, GAT: Gatifloxacin, LVF: Levofloxacin, CIP: Ciprofloxacin |         |       |       |       |       |       |       |       |       |       |       |       |       |      |
